# Supplementary material
Source: PubMed Central journal article supplement (PMC3870746)
Supplement: 1315162110_pnas.201315162SI.pdf [file 1315162110_pnas.201315162SI.pdf]

# Supporting Information

Lewis et al. 10.1073/pnas.1315162110

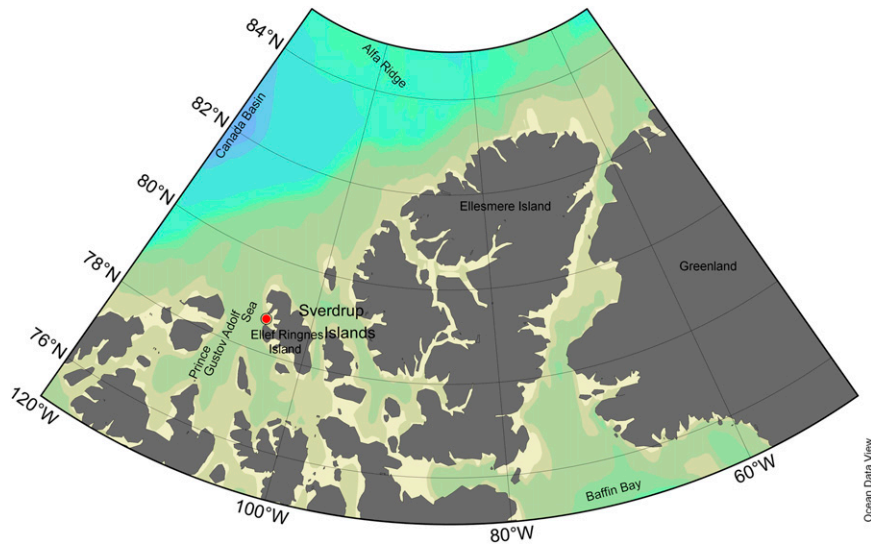

Fig. S1. Map of the location of the Catlin Ice Base (CIB) off Ellef Ringnes Island in the Canadian high Arctic. The CIB is marked with the red circle.

**Table S1. Sun and light data for the dates of the 24-h zooplankton sampling**

| Sun and light parameters |         | March 20, 2011   | March 21, 2011   | April 23, 2011   | April 24, 2011   |
|--------------------------|---------|------------------|------------------|------------------|------------------|
| Astronomical twilight    | Start   | Rest of night    | Rest of night    | —                | —                |
|                          | End     |                  |                  |                  |                  |
| Nautical twilight        | Start   | 0405 hours       | 0355 hours       | —                | —                |
|                          | End     | 2256 hours       | 2306 hours       |                  |                  |
| Civil twilight           | Start   | 0557 hours       | 0550 hours       | Rest of night    | Rest of night    |
|                          | End     | 2101 hours       | 2107 hours       |                  |                  |
| Sunrise                  |         | 0717 hours       | 0711 hours       | 0319 hours       | 03:08            |
| Sunset                   |         | 1940 hours       | 1945 hours       | 2325 hours       | 23:37            |
| Day length               |         | 12 h 22 min 41 s | 12 h 34 min 15 s | 20 h 06 min 36 s | 20 h 28 min 30 s |
| Light intensity, lux     | Minimum | 0                | 0                | 2,009.3          | 2,343.0          |
|                          | Maximum | 26,522.4         | 31,344.7         | 101,037.7        | 71,644.9         |

Sun data were provided for Resolute Bay (77° N and 2° S of the Catlin Arctic Survey Ice Base). Time is given in 24 h, local time; light intensity (lux) was measured at the ice base using Hobo data loggers on the surface of the ice.
